# Supplementary material for: Effects of the delivery of physiotherapy on the treatment course of elderly fallers presenting to the emergency department: Protocol for a randomized clinical trial
Source: PubMed Central journal article supplement (PMC11078381; doi:10.1371/journal.pone.0303362), 2024-05-08

| Study flow chart |                                            |                                                |                        |                          |                             |                      |
|------------------|--------------------------------------------|------------------------------------------------|------------------------|--------------------------|-----------------------------|----------------------|
| Phase            |                                            |                                                | Stage date phase start | Phase duration (in days) | Stage End of phase          | Stage date phase end |
| Step 1           | Research project instruction               | Success in the AAP and notification of credits | 12/12/2022             | 73                       | Ethical advice              | 23/02/2023           |
| Step 2           | Period of inclusion and/or data collection | Ethical advice                                 | 23/02/2023             | 432                      | End of the inclusion period | 30/04/2024           |
| Step 3           | Period of inclusion and/or data collection | End of the inclusion period                    | 30/04/2024             | 185                      | Base gel                    | 01/11/2024           |
| Step 4           | Data analysis                              | Base gel                                       | 01/11/2024             | 187                      | Final report                | 07/05/2025           |
| Step 5           | Valorization                               | Final report                                   | 07/05/2025             | 117                      | Publication submission      | 01/06/2025           |
|                  |                                            | Publication submission                         | 01/06/2025             | 92                       | Publication princeps        | 01/09/2025           |

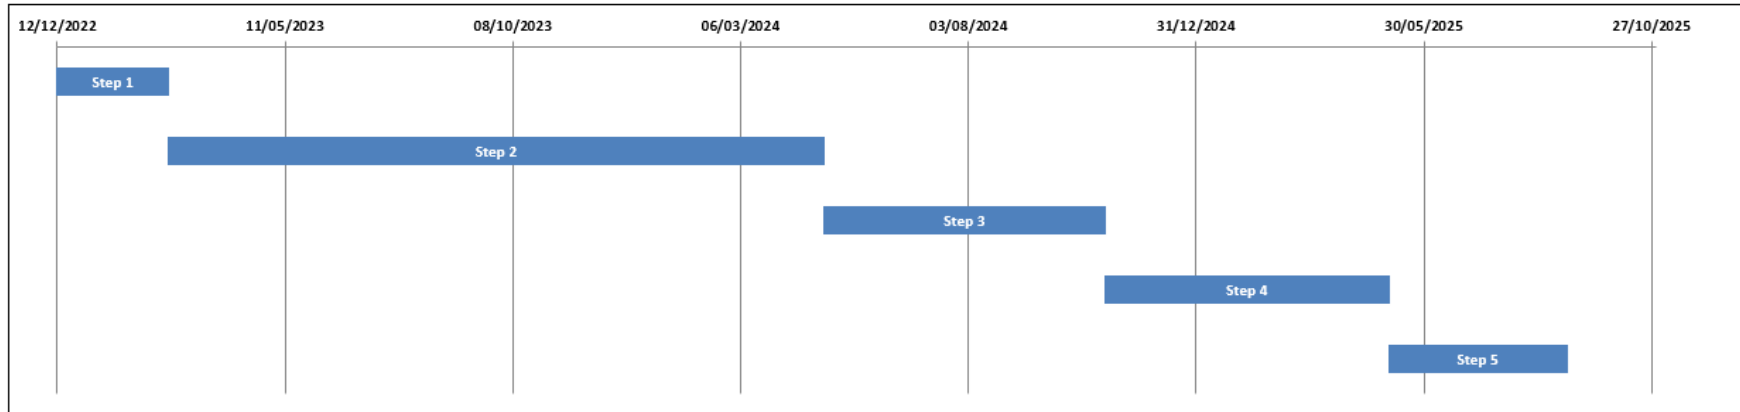

Supplement: pone.0303362.s003.pdf [file pone.0303362.s003.pdf]
